# Supplementary material for: Assessment of Children’s Metal Exposure via Hand Wipe, Outdoor Soil and Indoor Dust and Their Associations with Blood Biomarkers
Source: MDPI journal article supplement (doi:10.3390/ijerph192114614), 2022-11-07
Supplement: s1 [file s1]

## **Supporting Information**

**Assessment of children's metals exposure via hand wipe, outdoor soil and indoor dust, and their associations with blood biomarkers: comparison of different evaluation campaigns**

Wang Beibei <sup>a</sup>, Gao Fei <sup>a</sup>, Lin Chunye <sup>b</sup>, Cheng Hongguang <sup>b</sup>, Ma Jin <sup>c</sup>, Duan Xiaoli <sup>a,\*</sup>

<sup>a</sup> School of Energy and Environmental Engineering, University of Science and Technology Beijing, Beijing, 100083, PR China

<sup>b</sup> State Key Joint Laboratory of Environmental Simulation and Pollution Control, School of Environment, Beijing Normal University, Beijing, 100875, PR China

<sup>c</sup> State Key Laboratory of Environmental Criteria and Risk Assessment, Chinese Research Academy of Environmental Sciences, Beijing, 100012, PR China

**Table S1.** Instrument and method detection limits for different metals in the study

| Metals | Detection limit ( $\mu\text{g}\cdot\text{kg}^{-1}$ ) | RSD% | Recovery% |
|--------|------------------------------------------------------|------|-----------|
| Pb     | 8.0                                                  | 2.65 | 94.81     |
| Cr     | 10.0                                                 | 3.01 | 96.43     |
| Cd     | 5.0                                                  | 2.18 | 95.34     |
| Mn     | 15.0                                                 | 2.31 | 97.32     |
| Ni     | 10.0                                                 | 1.56 | 104.51    |
| Cu     | 10.0                                                 | 4.11 | 106.31    |
| Zn     | 20.0                                                 | 2.81 | 102.52    |
| As     | 4.0                                                  | 3.62 | 101.36    |

**Table S2.** The value of parameters in exposure assessment via different sampling and evaluation strategies.

| arameters                          | values                   | reference                                 |
|------------------------------------|--------------------------|-------------------------------------------|
| $Q_{hw}$ , $C_{dust}$ , $C_{soil}$ | personalized             | According to the sampling and measurement |
| $H_{contact-area}$                 | 0.1                      | Stapleton et al. (2008)                   |
| $TE$                               | 0.5                      | kissel et al. (1998)                      |
| $f_{hm}$                           | personalized             | According to questionnaire results        |
| $t_{exp}$                          | 12                       | Ma et al. (2018)                          |
| $BW$                               | personalized             | According to questionnaire results        |
| $IR_{dust}$                        | 72 mg/day (3-6)          | Lin et al. (2017)                         |
|                                    | 103 mg/day (7-12)        | Wang et al. (2018)                        |
| $IR_{soil}$                        | 72 mg/day (3-6)          | Lin et al. (2017)                         |
|                                    | 103 mg/day (7-12)        | Wang et al. (2018)                        |
| $f$                                | 0.5                      | Liu et al. (2018)                         |
| $SD$                               | 0.099 mg/cm <sup>2</sup> | Kissel et al. (1996)                      |
| $DA$                               | 0.011 mg/cm <sup>2</sup> | Holmes et al. (1999)                      |
| $f_{hs}$                           | personalized             | According to questionnaire results        |
| $ABS$                              | As: 0.03                 | U.S.EPA 2004                              |
|                                    | Others: 0.001            |                                           |
| $SA$                               | personalized             | According to questionnaire results        |

**Table S3.** Summary of toxicity factors used for risk assessment

| Contaminant of<br>potential concern | Oral RfD<br>(mg·kg <sup>-1</sup> day <sup>-1</sup> ) | Dermal RfD<br>(mg·kg <sup>-1</sup> day <sup>-1</sup> ) | Oral SF<br>(mg·kg <sup>-1</sup> day <sup>-1</sup> ) <sup>-1</sup> | Dermal SF<br>(mg·kg <sup>-1</sup> day <sup>-1</sup> ) <sup>-1</sup> |
|-------------------------------------|------------------------------------------------------|--------------------------------------------------------|-------------------------------------------------------------------|---------------------------------------------------------------------|
| Pb                                  | 3.50E-03                                             | 5.25E-04                                               | NA                                                                | NA                                                                  |
| Cr                                  | 3.00E-03*                                            | 3.00E-03*                                              | 5.01E-01                                                          | 2.00E+01                                                            |
| Cd                                  | 1.00E-03                                             | 1.00E-05                                               | NA                                                                | NA                                                                  |
| Mn                                  | 1.40E-01                                             | 2.33E-02                                               | NA                                                                | NA                                                                  |
| Ni                                  | 2.00E-02                                             | 5.40E-03                                               | 1.70E+00                                                          | 4.25E+01                                                            |
| Cu                                  | 4.00E-02                                             | 1.20E-02                                               | NA                                                                | NA                                                                  |
| Zn                                  | 3.00E-01                                             | 6.00E-02                                               | NA                                                                | NA                                                                  |
| As                                  | 3.00E-04                                             | 1.23E-04                                               | 1.50E+00                                                          | 3.66E+00                                                            |

NA—not applicable

\*—the RfD is for Cr (VI)

**Table S4.** The non-carcinogenic risk from exposure to metals in hand wipes through hand to mouth contact and dermal absorption pathway.

| Metals | hand to mouth contact |         |         | Dermal absorption |         |         | Total   |         |         |
|--------|-----------------------|---------|---------|-------------------|---------|---------|---------|---------|---------|
|        | Median                | P5      | P95     | Median            | P5      | P95     | Median  | P5      | P95     |
| Cr     | 1.5E-01               | 3.9E-02 | 5.5E-01 | 4.4E-04           | 1.5E-04 | 1.8E-03 | 1.5E-01 | 3.9E-02 | 5.6E-01 |
| Mn     | 4.9E-03               | 9.7E-04 | 3.2E-02 | 9.6E-05           | 2.0E-05 | 3.2E-04 | 5.0E-03 | 9.9E-04 | 3.2E-02 |
| Ni     | 2.8E-03               | 7.0E-04 | 9.6E-03 | 2.6E-05           | 8.8E-06 | 1.3E-04 | 2.9E-03 | 7.1E-04 | 9.7E-03 |
| Cu     | 2.5E-03               | 6.1E-04 | 1.3E-02 | 2.2E-05           | 9.2E-06 | 1.0E-04 | 2.6E-03 | 6.2E-04 | 1.3E-02 |
| Zn     | 1.5E-03               | 4.4E-04 | 7.7E-03 | 2.3E-05           | 5.6E-06 | 8.2E-05 | 1.5E-03 | 4.4E-04 | 7.7E-03 |
| As     | 7.6E-02               | 7.1E-03 | 4.4E-01 | 2.7E-02           | 8.0E-03 | 1.4E-01 | 1.0E-01 | 1.5E-02 | 5.8E-01 |
| Cd     | 1.9E-03               | 4.7E-04 | 6.1E-03 | 5.2E-04           | 1.6E-04 | 1.8E-03 | 2.4E-03 | 6.3E-04 | 7.9E-03 |
| Pb     | 4.3E-02               | 1.2E-02 | 3.1E-01 | 1.1E-03           | 2.6E-04 | 5.1E-03 | 4.4E-02 | 1.2E-02 | 3.1E-01 |
| Sum    | 2.8E-01               | 6.1E-02 | 1.4E+00 | 2.9E-02           | 8.6E-03 | 1.4E-01 | 3.1E-01 | 7.0E-02 | 1.5E+00 |

**Table S5.** The cancer risk from exposure to metals in hand wipes through hand to mouth contact and dermal absorption pathway.

| Metals | Hand to mouth contact |         |         | Dermal absorption |         |         | Total   |         |         |
|--------|-----------------------|---------|---------|-------------------|---------|---------|---------|---------|---------|
|        | Median                | P5      | P95     | Median            | P5      | P95     | Median  | P5      | P95     |
| Cr     | 2.3E-04               | 5.9E-05 | 8.3E-04 | 2.6E-05           | 8.8E-06 | 1.1E-04 | 2.5E-04 | 6.7E-05 | 9.4E-04 |
| Ni     | 9.6E-05               | 2.4E-05 | 3.3E-04 | 5.9E-06           | 2.0E-06 | 3.1E-05 | 1.0E-04 | 2.6E-05 | 3.6E-04 |
| As     | 3.4E-05               | 3.2E-06 | 2.0E-03 | 1.2E-05           | 3.6E-06 | 6.1E-04 | 4.6E-05 | 6.8E-06 | 2.6E-03 |
| Sum    | 3.6E-04               | 8.6E-05 | 3.1E-03 | 4.4E-05           | 1.4E-05 | 7.5E-04 | 4.0E-04 | 1.0E-04 | 3.9E-03 |

**Table S6.** The non-carcinogenic risk form exposure to metals in outdoor soil through ingestion and dermal absorption pathway.

| Metals | Soil ingestion |         |         | Dermal absorption |         |         | Total   |         |         |
|--------|----------------|---------|---------|-------------------|---------|---------|---------|---------|---------|
|        | Median         | P5      | P95     | Median            | P5      | P95     | Median  | P5      | P95     |
| Cr     | 2.4E-02        | 8.7E-03 | 4.2E-02 | 1.0E-04           | 4.5E-05 | 1.9E-04 | 2.4E-02 | 8.7E-03 | 4.2E-02 |
| Mn     | 4.5E-03        | 1.6E-03 | 7.4E-03 | 1.3E-04           | 5.0E-05 | 2.0E-04 | 4.6E-03 | 1.6E-03 | 7.6E-03 |
| Ni     | 2.1E-03        | 7.1E-04 | 2.9E-03 | 3.2E-05           | 1.4E-05 | 5.5E-05 | 2.1E-03 | 7.3E-04 | 2.9E-03 |
| Cu     | 8.5E-04        | 3.3E-04 | 1.2E-03 | 1.1E-05           | 6.3E-06 | 2.0E-05 | 8.7E-04 | 3.4E-04 | 1.2E-03 |
| Zn     | 3.8E-04        | 1.5E-04 | 5.3E-04 | 7.6E-06           | 4.7E-06 | 1.4E-05 | 3.9E-04 | 1.5E-04 | 5.4E-04 |
| As     | 4.1E-02        | 1.6E-02 | 7.5E-02 | 1.3E-02           | 5.9E-03 | 2.2E-02 | 5.4E-02 | 2.2E-02 | 9.7E-02 |
| Cd     | 4.7E-04        | 2.1E-04 | 7.5E-04 | 2.0E-04           | 9.3E-05 | 3.2E-04 | 6.7E-04 | 3.1E-04 | 1.1E-03 |
| Pb     | 8.0E-03        | 3.2E-03 | 1.9E-02 | 2.3E-04           | 1.1E-04 | 5.6E-04 | 8.2E-03 | 3.3E-03 | 2.0E-02 |
| Sum    | 8.2E-02        | 3.1E-02 | 1.5E-01 | 1.4E-02           | 6.3E-03 | 2.3E-02 | 9.5E-02 | 3.7E-02 | 1.7E-01 |

**Table S7** The cancer risk form exposure to metals in outdoor soil through ingestion and dermal absorption pathway.

| Metals | Soil ingestion |         |         | Dermal absorption |         |         | Total   |         |         |
|--------|----------------|---------|---------|-------------------|---------|---------|---------|---------|---------|
|        | Median         | P5      | P95     | Median            | P5      | P95     | Median  | P5      | P95     |
| Cr     | 3.7E-05        | 1.3E-05 | 6.3E-05 | 6.1E-06           | 2.7E-06 | 1.2E-05 | 4.3E-05 | 1.6E-05 | 7.5E-05 |
| Ni     | 7.0E-05        | 2.4E-05 | 9.8E-05 | 7.3E-06           | 3.1E-06 | 1.3E-05 | 7.7E-05 | 2.7E-05 | 1.1E-04 |
| As     | 1.8E-05        | 7.1E-06 | 3.4E-05 | 5.8E-06           | 2.7E-06 | 1.0E-05 | 2.4E-05 | 9.8E-06 | 4.4E-05 |
| Sum    | 1.3E-04        | 4.4E-05 | 1.9E-04 | 1.9E-05           | 8.5E-06 | 3.4E-05 | 1.4E-04 | 5.3E-05 | 2.3E-04 |

**Table S8.** The non-carcinogenic risk form exposure to metals in indoor dust through ingestion and dermal absorption pathway.

| Metals | Dust ingestion |         |         | Dermal absorption |         |         | Total   |         |         |
|--------|----------------|---------|---------|-------------------|---------|---------|---------|---------|---------|
|        | Median         | P5      | P95     | Median            | P5      | P95     | Median  | P5      | P95     |
| Cr     | 3.4E-02        | 7.6E-03 | 7.2E-02 | 1.7E-05           | 5.3E-06 | 3.2E-05 | 3.4E-02 | 7.6E-03 | 7.2E-02 |
| Mn     | 3.3E-03        | 4.7E-04 | 1.3E-02 | 1.2E-05           | 2.6E-06 | 3.7E-05 | 3.3E-03 | 4.7E-04 | 1.3E-02 |
| Ni     | 2.0E-03        | 4.5E-04 | 4.2E-03 | 3.7E-06           | 1.2E-06 | 6.8E-06 | 2.0E-03 | 4.5E-04 | 4.2E-03 |
| Cu     | 8.5E-04        | 1.9E-04 | 2.3E-03 | 1.7E-06           | 4.7E-07 | 3.6E-06 | 8.5E-04 | 1.9E-04 | 2.3E-03 |
| Zn     | 5.3E-04        | 8.6E-05 | 1.2E-03 | 1.4E-06           | 3.3E-07 | 4.0E-06 | 5.3E-04 | 8.6E-05 | 1.2E-03 |
| As     | 1.1E-01        | 2.7E-02 | 2.4E-01 | 3.9E-03           | 1.1E-03 | 7.8E-03 | 1.2E-01 | 2.8E-02 | 2.5E-01 |
| Cd     | 8.5E-04        | 1.2E-04 | 2.3E-03 | 4.5E-05           | 1.0E-05 | 1.6E-04 | 9.0E-04 | 1.3E-04 | 2.4E-03 |
| Pb     | 1.2E-02        | 5.3E-03 | 6.2E-02 | 6.4E-05           | 2.1E-05 | 1.1E-04 | 1.2E-02 | 5.3E-03 | 6.2E-02 |
| Sum    | 1.7E-01        | 4.1E-02 | 3.9E-01 | 4.1E-03           | 1.2E-03 | 8.2E-03 | 1.7E-01 | 4.3E-02 | 4.0E-01 |

**Table S9.** The cancer risk form exposure to metals in indoor dust through ingestion and dermal absorption pathway.

| Metals | Dust ingestion |         |         | Dermal absorption |         |         | Total   |         |         |
|--------|----------------|---------|---------|-------------------|---------|---------|---------|---------|---------|
|        | Median         | P5      | P95     | Median            | P5      | P95     | Median  | P5      | P95     |
| Cr     | 5.1E-05        | 1.1E-05 | 1.1E-04 | 1.0E-06           | 3.2E-07 | 1.9E-06 | 5.2E-05 | 1.2E-05 | 1.1E-04 |
| Ni     | 6.7E-05        | 1.5E-05 | 1.4E-04 | 8.4E-07           | 2.7E-07 | 1.6E-06 | 6.8E-05 | 1.6E-05 | 1.4E-04 |
| As     | 5.1E-05        | 1.2E-05 | 1.1E-04 | 1.8E-06           | 5.1E-07 | 3.5E-06 | 5.3E-05 | 1.3E-05 | 1.1E-04 |
| Sum    | 1.7E-04        | 3.9E-05 | 3.6E-04 | 3.6E-06           | 1.1E-06 | 7.0E-06 | 1.7E-04 | 4.0E-05 | 3.6E-04 |

**Table S10.** Spearman's Rank Correlations coefficient of metals concentrations in blood and in external exposure concentration.

| Metals | blood VS hand wipe | blood VS outdoor soil | blood VS indoor dust |
|--------|--------------------|-----------------------|----------------------|
| Cr     | <b>0.416*</b>      | 0.264                 | 0.214                |
| Mn     | <b>0.339*</b>      | 0.327                 | 0.055                |
| Ni     | 0.05               | 0.391                 | 0.267                |
| Cu     | 0.195              | 0.445                 | 0.233                |
| Zn     | 0.016              | 0.109                 | 0.393                |
| As     | 0.064              | 0.375                 | 0.427                |
| Cd     | 0.023              | 0.173                 | 0.035                |
| Pb     | <b>0.534**</b>     | 0.152                 | 0.154                |

\*\*Correlation is significant at the 0.01 level (2-tailed)

\* Correlation is significant at the 0.05 level (2-tailed)

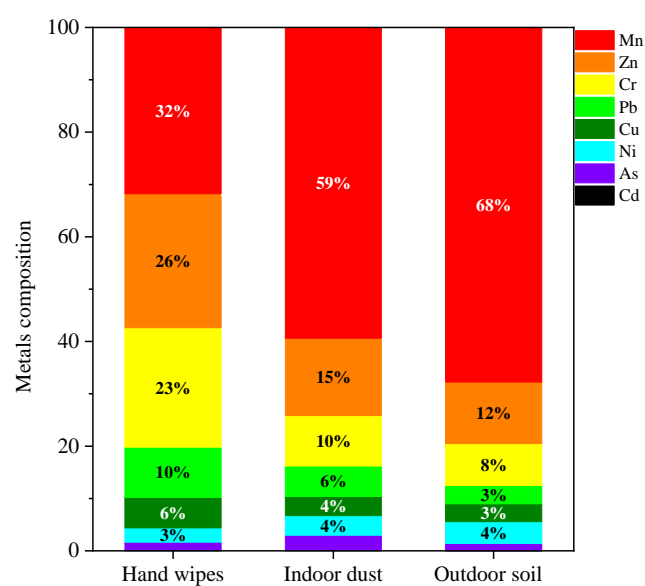

**Figure S1.** Comparison of metals concentration profile in hand wipes, indoor dust and outdoor soil

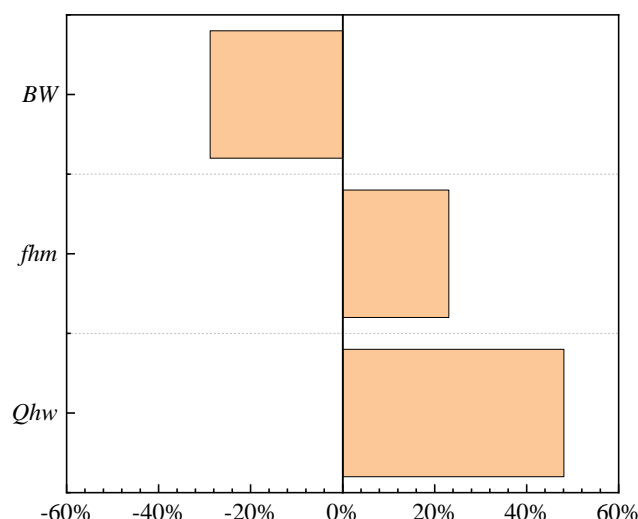

**Figure S2** the Sensitivity analysis of Cr oral exposure from hand wipe via hand to mouth pathway.

#### References:

Holmes, K.K., Shirai, J.H., Richter, K.Y., Kissel, J.C., 1999. Field measurement of dermal soil loadings in occupational and recreational activities. *Environmental Research* 80,(2), 148-157.

<https://doi.org/10.1006/enrs.1998.3891>

Kissel, J.C., Richter, K.Y., Fenske, R.A., 1996. Factors affecting soil adherence to skin in hand-press trials. *Bulletin of Environmental Contamination and Toxicology* 56,(5), 722-728.

<https://doi.org/10.1007/s001289900106>

Kissel, J.C., Shirai, J.H., Richter, K.Y., Fenske, R.A., 1998. Empirical investigation of hand-to-mouth transfer of soil. *Bulletin of Environmental Contamination and Toxicology* 60,(3), 379-386.

<https://doi.org/10.1007/s001289900637>

Lin, C., Wang, B., Cui, X., Xu, D., Cheng, H., Wang, Q., Ma, J., Chai, T., Duan, X., Liu, X., Ma, J., Zhang, X., Liu, Y., 2017. Estimates of Soil Ingestion in a Population of Chinese Children. *Environ Health Perspect* 125,(7), 077002. <https://doi.org/10.1289/EHP930>

Ma, J., Pan, L.B., Wang, Q., Lin, C.Y., Duan, X.L., Hou, H., 2018. Estimation of the daily soil/dust (SD) ingestion rate of children from Gansu Province, China via hand-to-mouth contact using tracer elements. *Environmental Geochemistry and Health* 40,(1), 295-301. <https://doi.org/10.1007/s10653-016-9906-1>

Stapleton, H.M., Kelly, S.M., Allen, J.G., McClean, M.D., Webster, T.F., 2008. Measurement of

polyhrominated diphenyl ethers on hand wipes: Estimating exposure from hand-to-mouth contact. Environmental Science & Technology 42,(9), 3329-3334. <https://doi.org/10.1021/es7029625>

U.S.EPA, 2004. Risk Assessment Guidance for Superfund Volume I: Human Health Evaluation Manual (Part E, Supplemental Guidance for Dermal Risk Assessment). U.S. Environmental Protection Agency, Washington, DC. EPA/540/R/99/005.

Wang, B., Lin, C., Zhang, X., Xu, D., Cheng, H., Wang, Q., Liu, X., Ma, J., 2018. Effects of geography, age, and gender on Chinese children's soil ingestion rate. Human and Ecological Risk Assessment: An International Journal 24,(7), 1983-1989. <https://doi.org/10.1080/10807039.2018.1435255>
